# Supplementary material
Source: Springer Nature journal article supplement (https://www.springermedizin.de/resource/supplementary/12913_2013_3137_MOESM1_ESM.pdf/9532422)

**Figure 1** Tornado Diagram demonstrating the percentage change in the cost benefit ratio following sensitivity analysis.

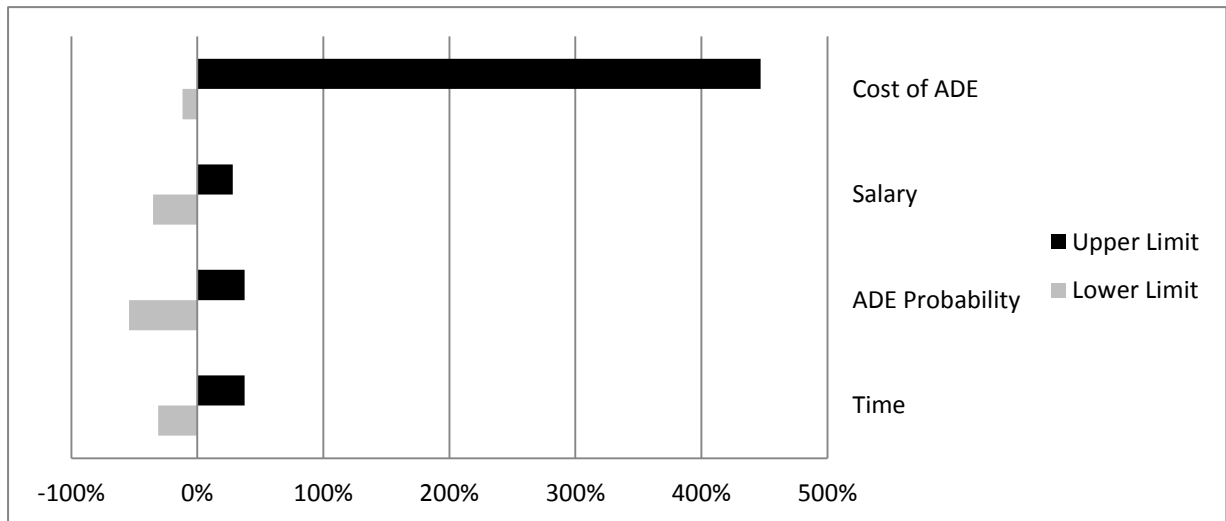

Supplement: MOESM1 [file 9532422]
